# Supplementary material for: Adverse Events Associated with Fosfomycin Use: Review of the Literature and Analyses of the FDA Adverse Event Reporting System Database
Source: PubMed Central journal article supplement — Infect Dis Ther. 2015 Oct 5;4(4):433–58. doi: 10.1007/s40121-015-0092-8 (PMC4675770; doi:10.1007/s40121-015-0092-8), 2015-10-05
Supplement: 40121_2015_92_MOESM1_ESM.pdf [file 40121_2015_92_MOESM1_ESM.pdf]

## *Why carry out this study?*

- The growing problem of antibacterial resistance resulted in an increased interest in fosfomycin, especially its parenteral formulation. Safety profile of fosfomycin has not been systematically reviewed.
- The study aimed to provide comprehensive description of adverse events (AEs) reported in association with fosfomycin, and asked whether there are any imbalances in the frequency of AEs associated with fosfomycin as compared to other antibacterial drugs and if there are any new safety signals related to fosfomycin as compared with its known safety profile.

## *What was learned from the study?*

- No new safety concerns related to fosfomycin have been identified.
- The study did not identify specific safety concerns related to fosfomycin and did not demonstrate imbalances in the frequency of AEs associated with its use as compared to other antibacterial drugs. Important safety consideration for parenteral fosfomycin is its high sodium content which may result in sodium overload and heart failure.

This summary slide represents the opinions of the authors. For a full list of acknowledgments and disclosures for all authors of this article, please see the full text online. © The Author(s) 2015. Creative Commons Attribution Noncommercial License (CC BY-NC).
